# Supplementary material for: An upconversion nanoparticle/Ru(ii) polypyridyl complex assembly for NIR-activated release of a DNA covalent-binding agent
Source: Royal Society of Chemistry journal article supplement (doi:10.1039/c6ra03396b), 2016-01-01
Supplement: c6ra03396b1.pdf [file c6ra03396b1.pdf]

## Electronic Supplementary Information

### **An upconversion nanoparticle/Ru(II) polypyridyl complex assembly for NIR-activated release of a DNA covalent-binding agent**

Yumeng Chen,<sup>†,‡</sup> Guoyu Jiang,<sup>\*,†</sup> Qianxiong Zhou,<sup>†</sup> Yangyang Zhang,<sup>†,‡</sup> Ke Li,<sup>†,‡</sup> Yue Zheng,<sup>†,‡</sup>  
Baowen Zhang,<sup>†</sup> and Xuesong Wang<sup>\*,†</sup>

<sup>†</sup>Key Laboratory of Photochemical Conversion and Optoelectronic Materials, Technical Institute  
of Physics and Chemistry, Chinese Academy of Sciences, Beijing 100190, P. R. China

<sup>‡</sup>University of Chinese Academy of Sciences, Beijing 100049, P. R. China

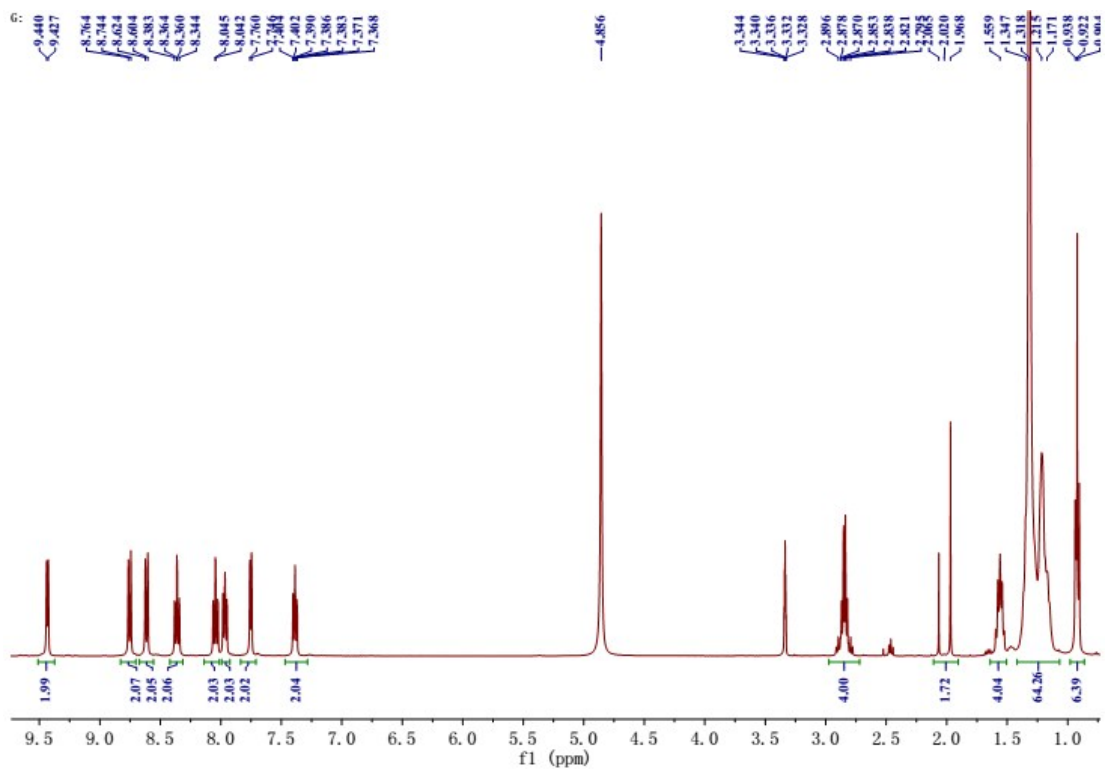

Figure S1.  $^1\text{H}$  NMR spectrum of **1** in  $\text{CD}_3\text{OD}$ .

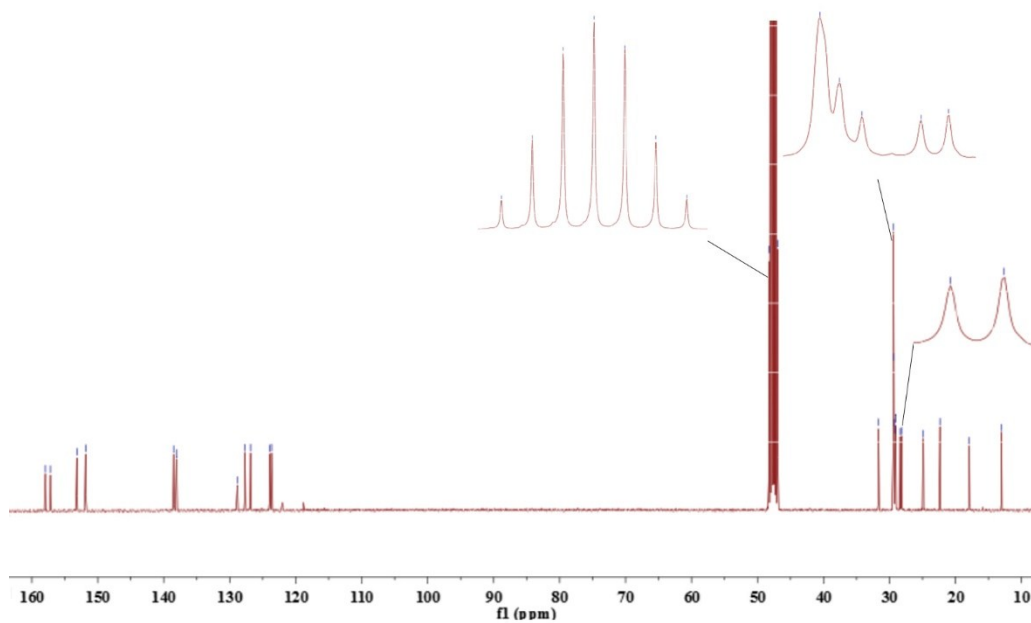

Figure S2.  $^{13}\text{C}$  NMR spectrum of **1** in  $\text{CD}_3\text{OD}$ .

Cheryumeng-3 #11 RT: 0.11 AV: 1 NL: 4.07E8  
T: FIMS+pESI Full ms [100.00-1500.00]

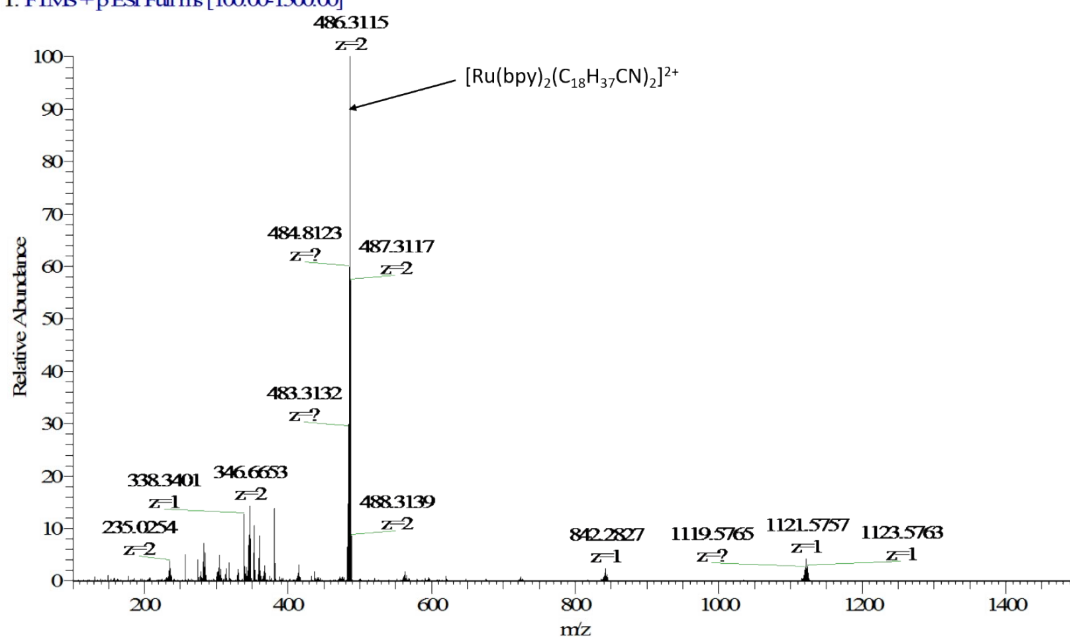

Figure S3. HR ESI-MS spectrum of 1 in H<sub>2</sub>O (10 % C<sub>2</sub>H<sub>5</sub>OH).

Cheryumeng-8 160120151641 #11-13 RT: 0.11-0.13 AV: 2 NL: 4.24E7  
T: FIMS+pESI Full ms [50.00-750.00]

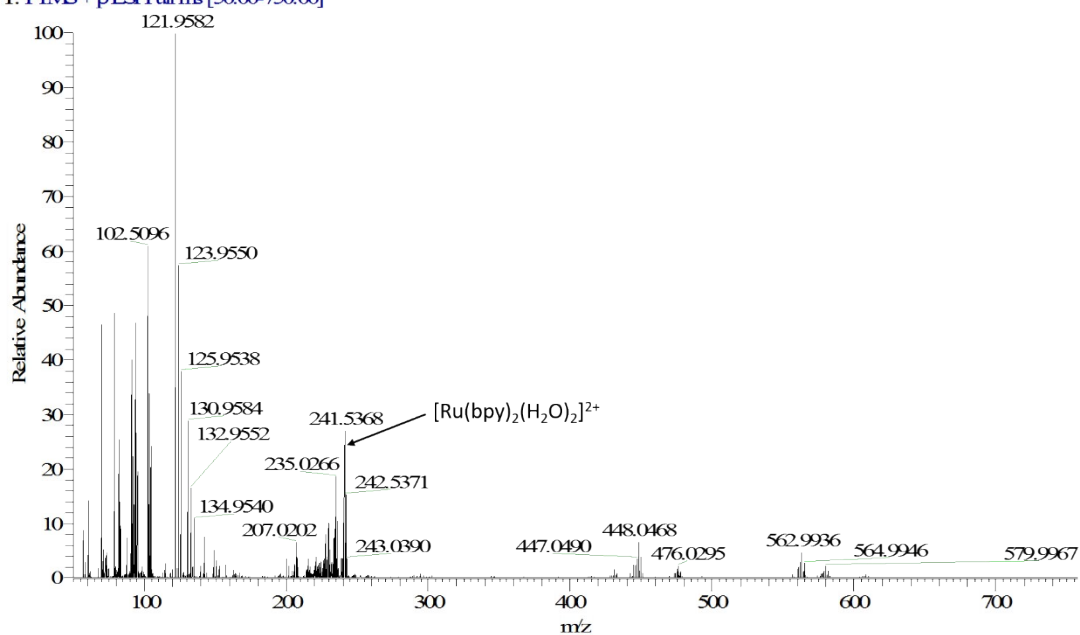

Figure S4. HR ESI-MS spectrum of 1 in H<sub>2</sub>O (10 % C<sub>2</sub>H<sub>5</sub>OH) after photolysis.

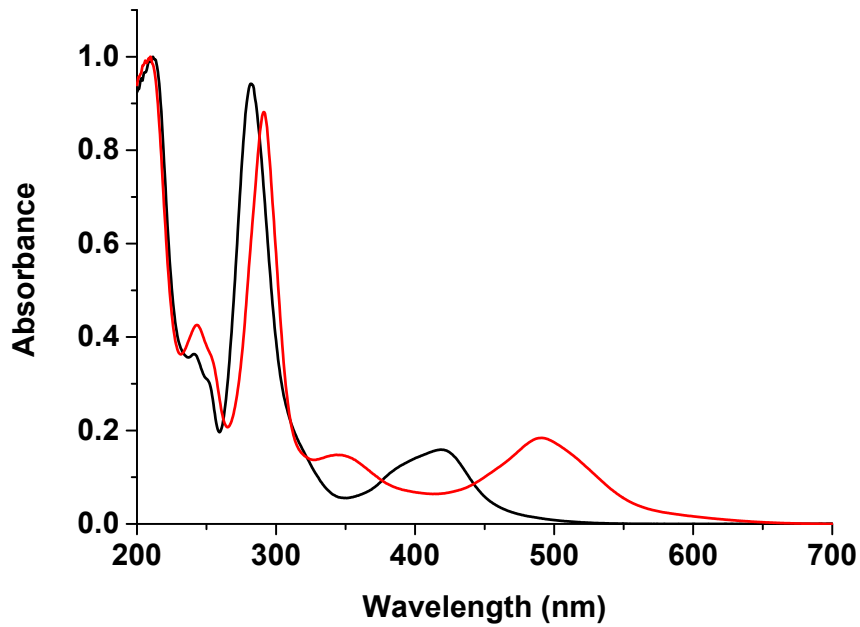

**Figure S5.** UV-visible absorption spectra of **1** in water (10 % C<sub>2</sub>H<sub>5</sub>OH) before (black) and after photolysis (red).

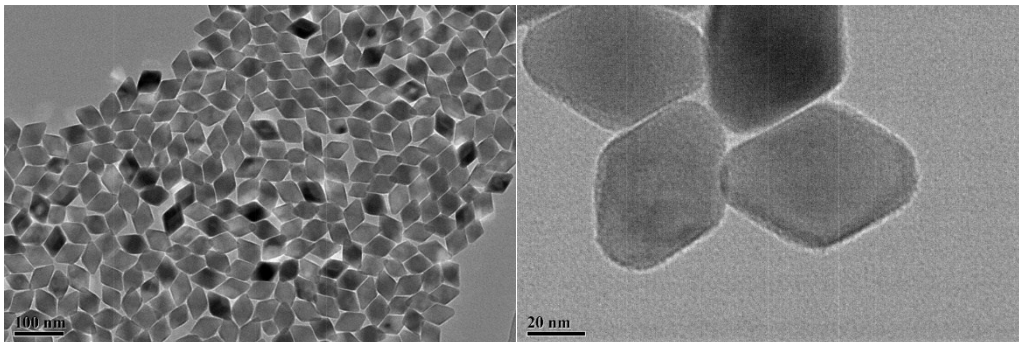

**Figure S6.** TEM images of oleic acid-capped LiYF<sub>4</sub>: Yb/Tm UCNPs.

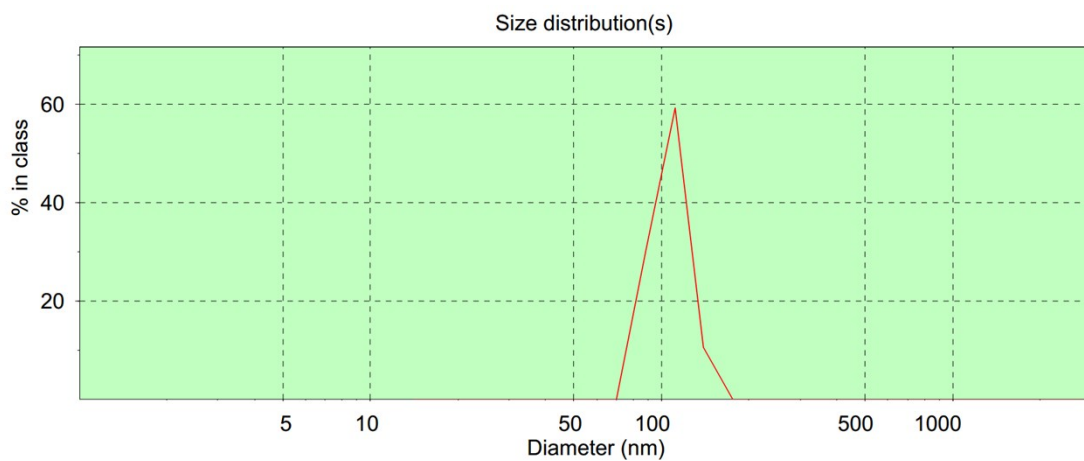

**Figure S7.** Dynamic light scattering profile of oleic acid-capped LiYF<sub>4</sub>: Yb/Tm UCNPs.

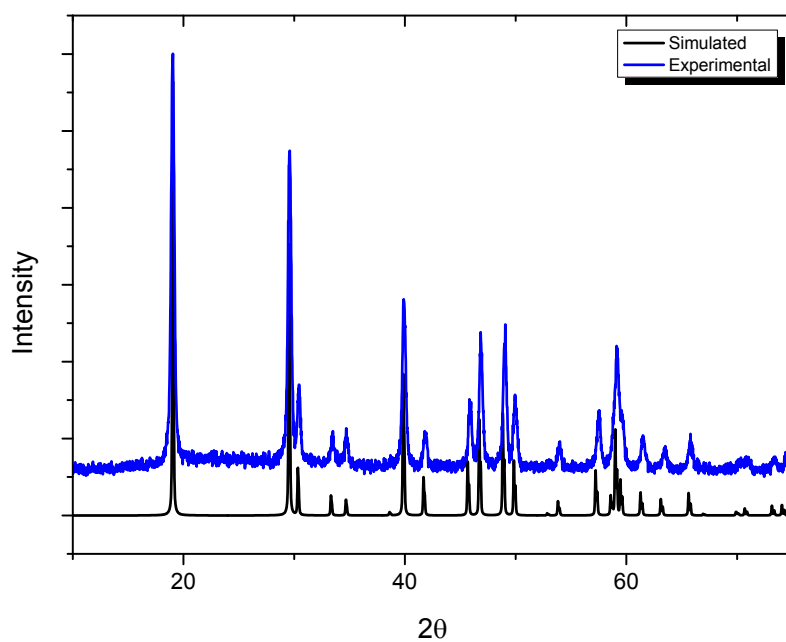

**Figure S8.** Experimental (blue line) and standard (black line) X-ray diffraction patterns for oleic acid-capped  $\text{LiYF}_4$ : Yb/Tm UCNPs.

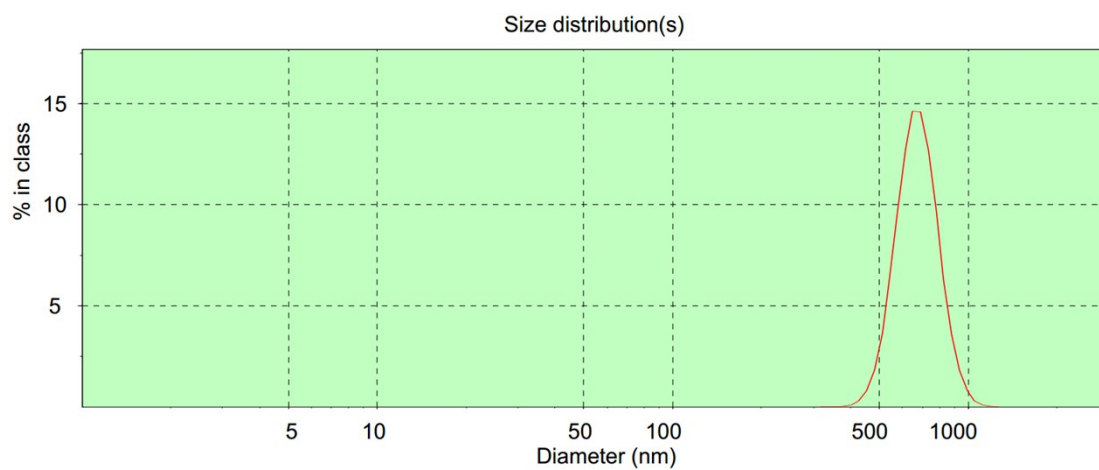

**Figure S9.** Dynamic light scattering profile of UCNPs@PEG/Ru.

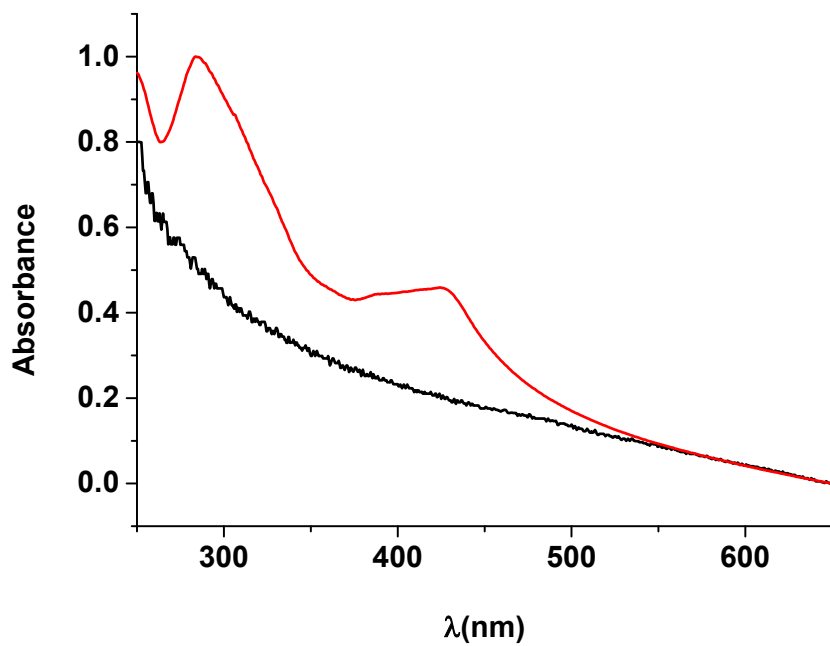

Figure S10. UV-visible absorption spectra of UCNP@PEG (black) and UCNPs@PEG/Ru (red).

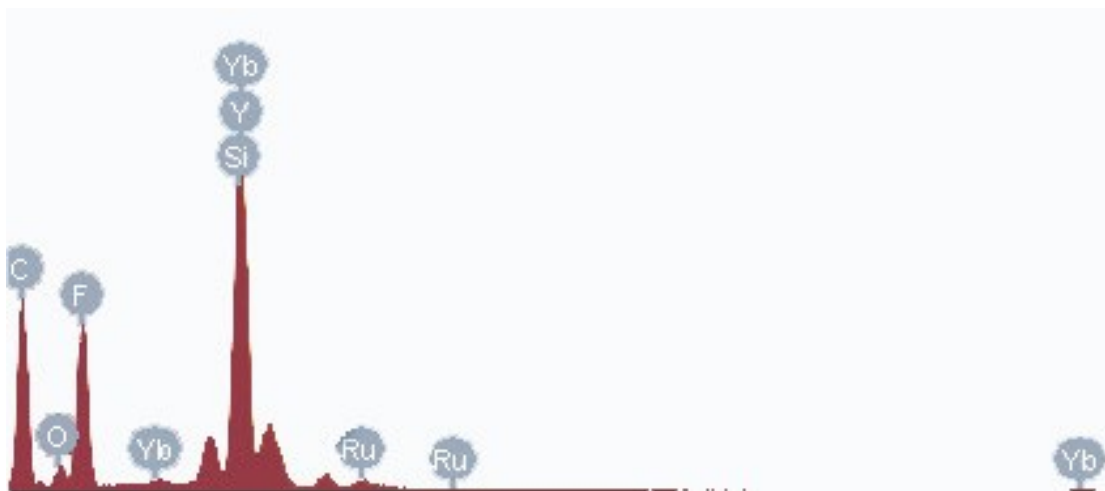

Figure S11. EDS images of UCNPs@PEG/Ru (Si is the base in EDS).

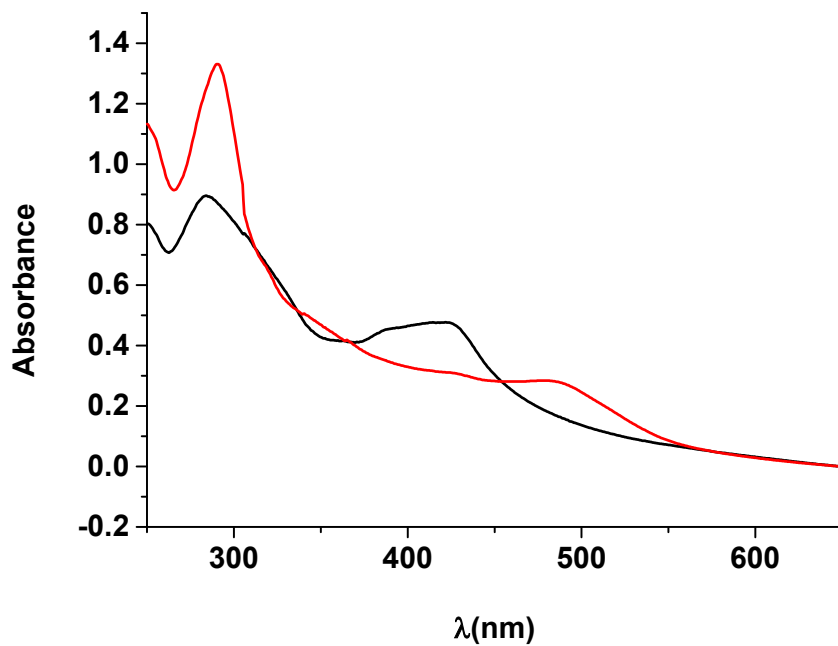

**Figure S12.** Absorption spectra of **UCNPs@PEG/Ru** before and after visible or NIR light irradiation.

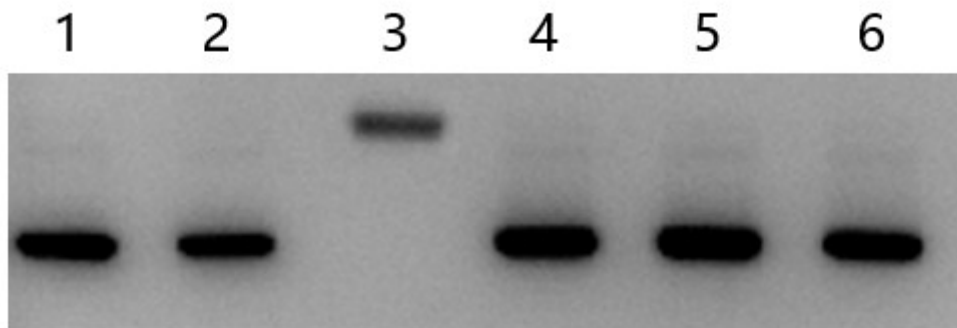

**Figure S13.** Agarose gel electrophoresis pattern of pUC19 DNA (25  $\mu\text{g}/\text{mL}$  in base pairs) in Tris-EDTA (5 mM, pH = 7.5). Lane 1, DNA alone (dark); lane 2, **1** (dark); lane 3, **1** + light ( $\lambda > 400$  nm); lane 4, **UCNPs@PEG** (dark); lane 5, **UCNPs@PEG** + light ( $\lambda > 400$  nm); lane 6, DNA alone + light ( $\lambda > 400$  nm,  $0.07 \text{ W}\cdot\text{cm}^{-2}$ ).
